# Supplementary material for: Dermal Papilla Cell Proliferation of Phytochemicals Isolated from Chestnut Shells (Castanea crenata)
Source: MDPI journal article supplement (doi:10.3390/plants12051018), 2023-02-23
Supplement: s1 [file s1]

## **Dermal Papilla Cell Proliferation of Phytochemicals Isolated from Chestnut Shells (*Castanea crenata*)**

SeonJu Park <sup>1</sup>, Nahyun Choi <sup>2</sup>, Le Nu Huyen Trang <sup>2</sup>, Mira Oh <sup>3,4</sup>, Youngse Oh <sup>3</sup>, Jong-Hyuk Sung <sup>2,3</sup>, and Seung Hyun Kim <sup>3,\*</sup>

<sup>1</sup> Chuncheon Center, Korea Basic Science Institute (KBSI), Chuncheon 24341, Republic of Korea

<sup>2</sup> Epibiotech Co., Ltd., Incheon 21984, Republic of Korea

<sup>3</sup> College of Pharmacy, Yonsei Institute of Pharmaceutical Sciences, Yonsei University, Incheon 21983, Republic of Korea

<sup>4</sup> Research Group of Traditional Food, Korea Food Research Institute, Wanju-gun 55365, Korea

\* Correspondence: kimsh11@yonsei.ac.kr

## List of Contents

| no. | Content                                                                      | Page |
|-----|------------------------------------------------------------------------------|------|
| 1   | <b>Figure S1</b> HR-ESI-MS of compound <b>1</b>                              | S3   |
| 2   | <b>Figure S2</b> $^1\text{H}$ -NMR spectrum of compound <b>1</b>             | S4   |
| 3   | <b>Figure S3</b> $^{13}\text{C}$ -NMR spectrum spectrum of compound <b>1</b> | S5   |
| 4   | <b>Figure S4</b> HSQC spectrum of compound <b>1</b>                          | S6   |
| 5   | <b>Figure S5</b> COSY of compound <b>1</b>                                   | S7   |
| 6   | <b>Figure S6</b> HMBC of compound <b>1</b>                                   | S8   |
| 7   | <b>Figure S7</b> HR-ESI-MS of compound <b>2</b>                              | S9   |
| 8   | <b>Figure S8</b> $^1\text{H}$ -NMR spectrum of compound <b>2</b>             | S10  |
| 9   | <b>Figure S9</b> $^{13}\text{C}$ -NMR spectrum of compound <b>2</b>          | S11  |
| 10  | <b>Figure S10</b> HSQC spectrum of compound <b>2</b>                         | S12  |
| 11  | <b>Figure S11</b> HMBC spectrum of compound <b>2</b>                         | S13  |
| 12  | <b>Figure S12</b> HR-ESI-MS of compound <b>6</b>                             | S14  |
| 13  | <b>Figure S13</b> $^1\text{H}$ -NMR spectrum of compound <b>6</b>            | S15  |
| 14  | <b>Figure S14</b> $^{13}\text{C}$ -NMR spectrum of compound <b>6</b>         | S16  |
| 15  | <b>Figure S15</b> HMBC spectrum of compound <b>6</b>                         | S17  |
| 16  | <b>Figure S16</b> HR-ESI-MS of compound <b>7</b>                             | S18  |
| 17  | <b>Figure S17</b> $^1\text{H}$ -NMR spectrum of compound <b>7</b>            | S19  |
| 18  | <b>Figure S18</b> $^{13}\text{C}$ -NMR spectrum of compound <b>7</b>         | S20  |
| 19  | <b>Figure S19</b> HR-ESI-MS of compound <b>8</b>                             | S21  |
| 20  | <b>Figure S20</b> $^1\text{H}$ -NMR spectrum of compound <b>8</b>            | S22  |
| 21  | <b>Figure S21</b> $^{13}\text{C}$ -NMR spectrum of compound <b>8</b>         | S23  |
| 22  | <b>Figure S22</b> HMBC spectrum of compound <b>8</b>                         | S24  |

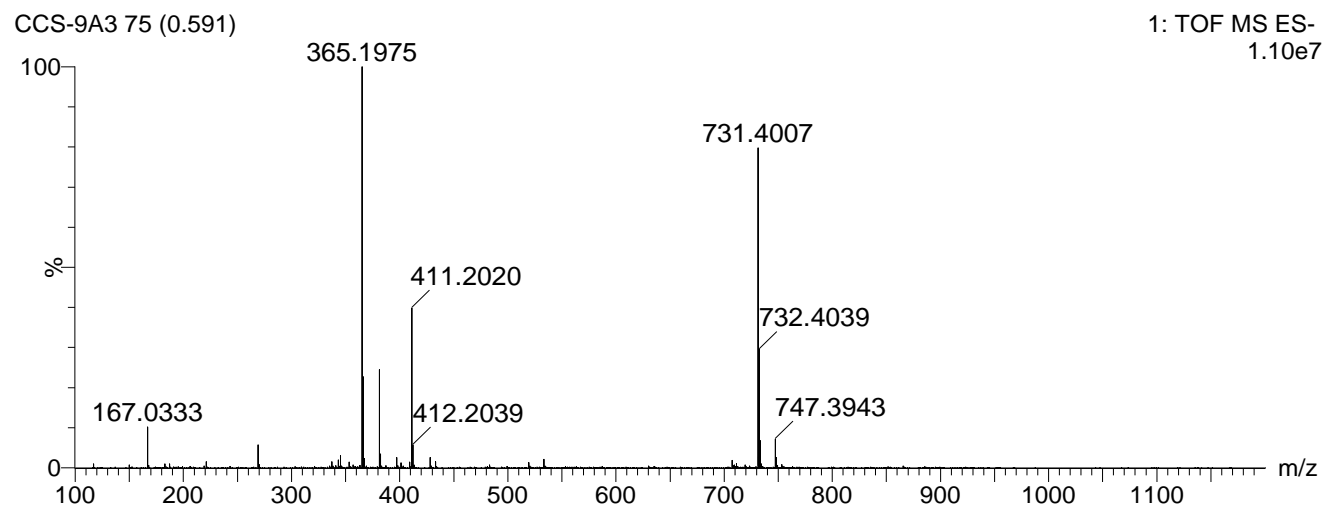

**Figure S1** HR-ESI-MS of compound **1**

CB-9A3/CB-9A3\_1H

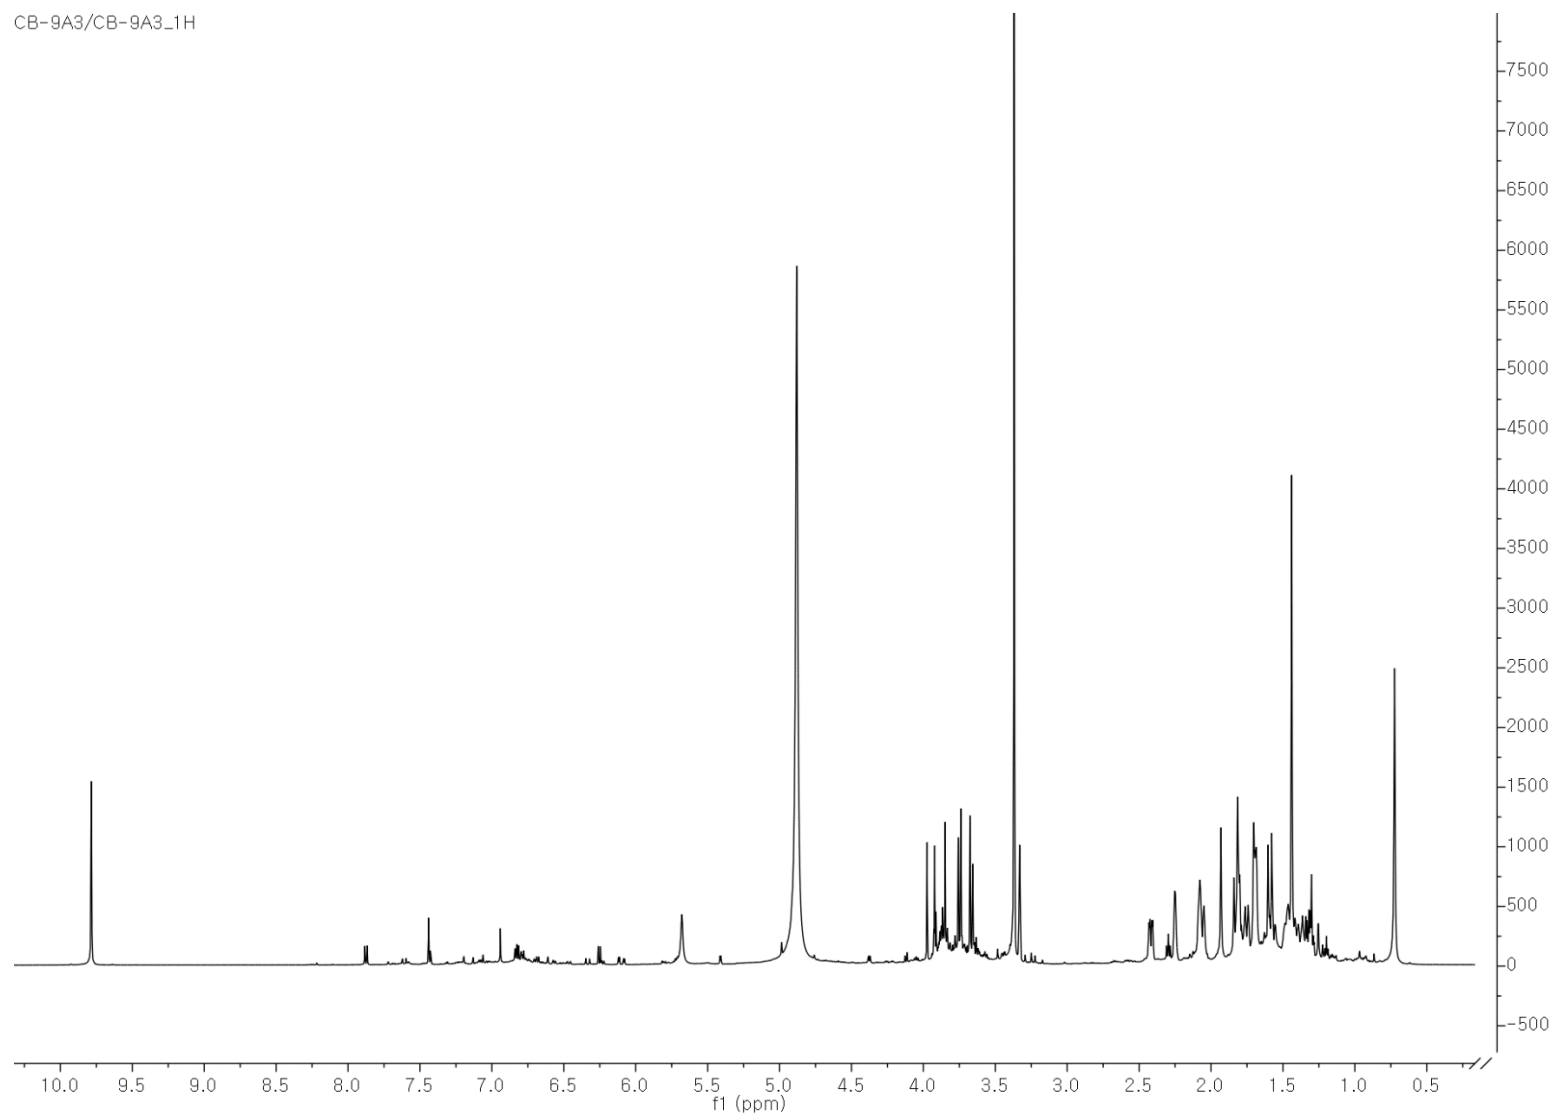

**Figure S2**  $^1\text{H}$ -NMR spectrum of compound **1** (600 MHz, methanol- $d_4$ )

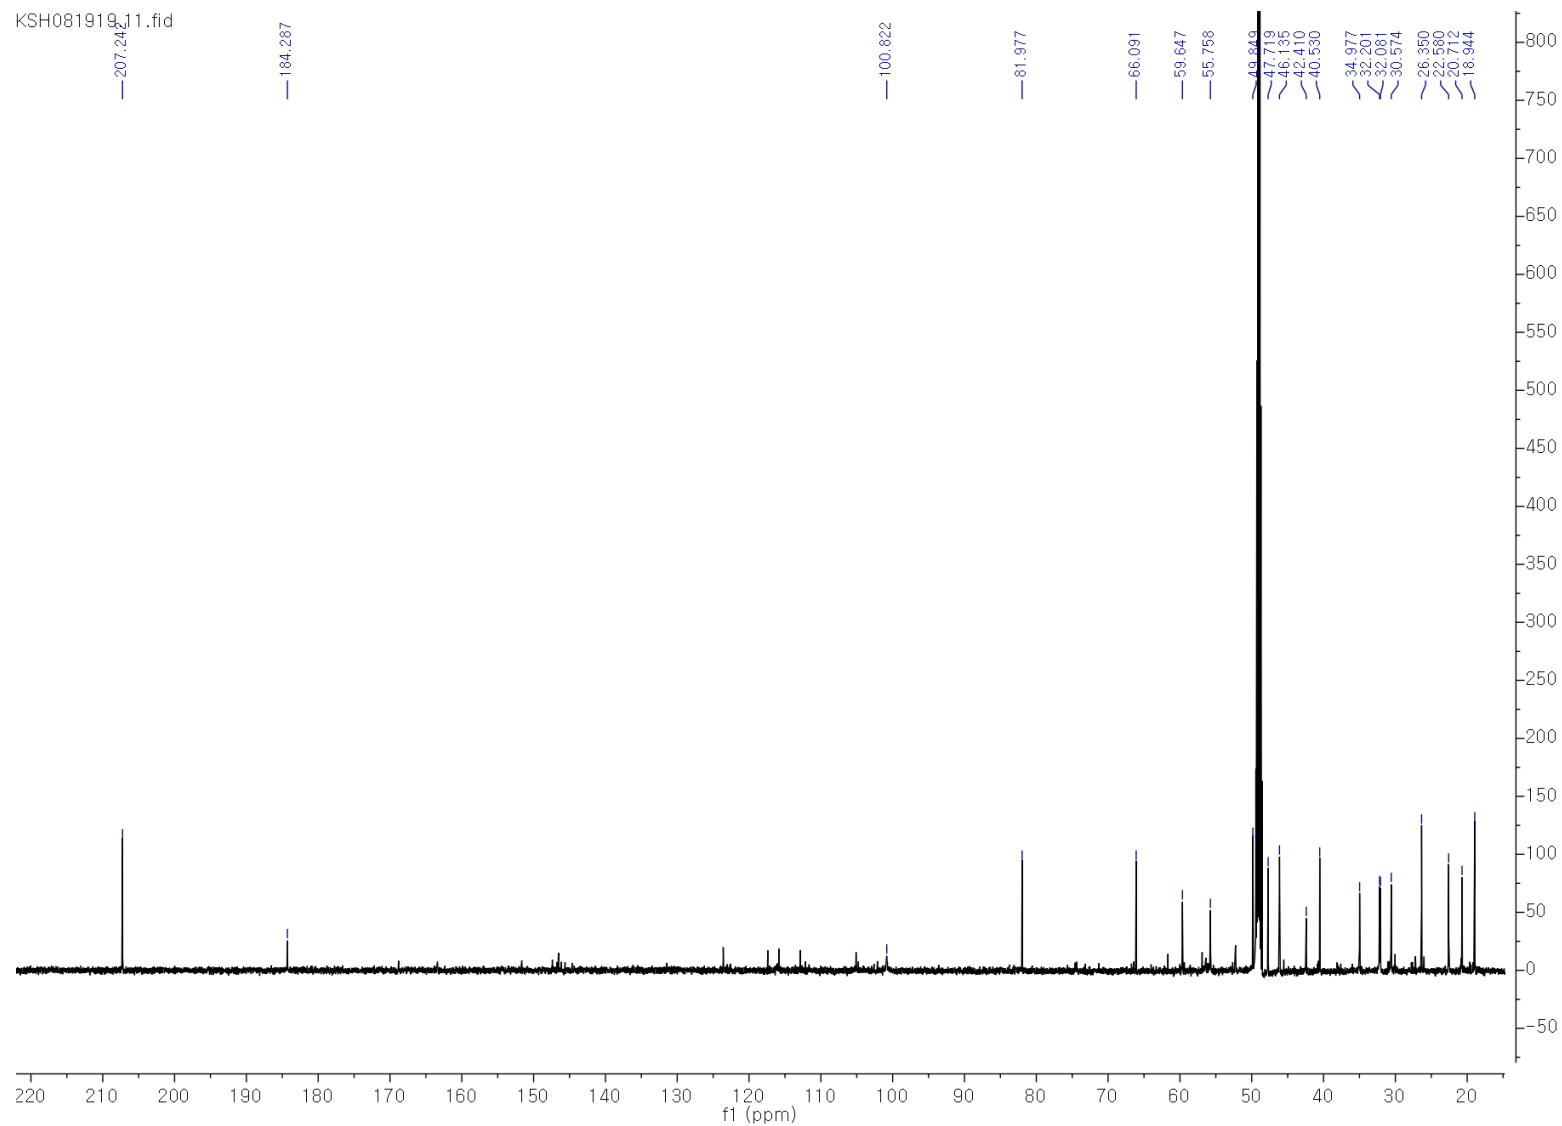

**Figure S3**  $^{13}\text{C}$ -NMR spectrum of compound **1** (150 MHz, methanol- $d_4$ )

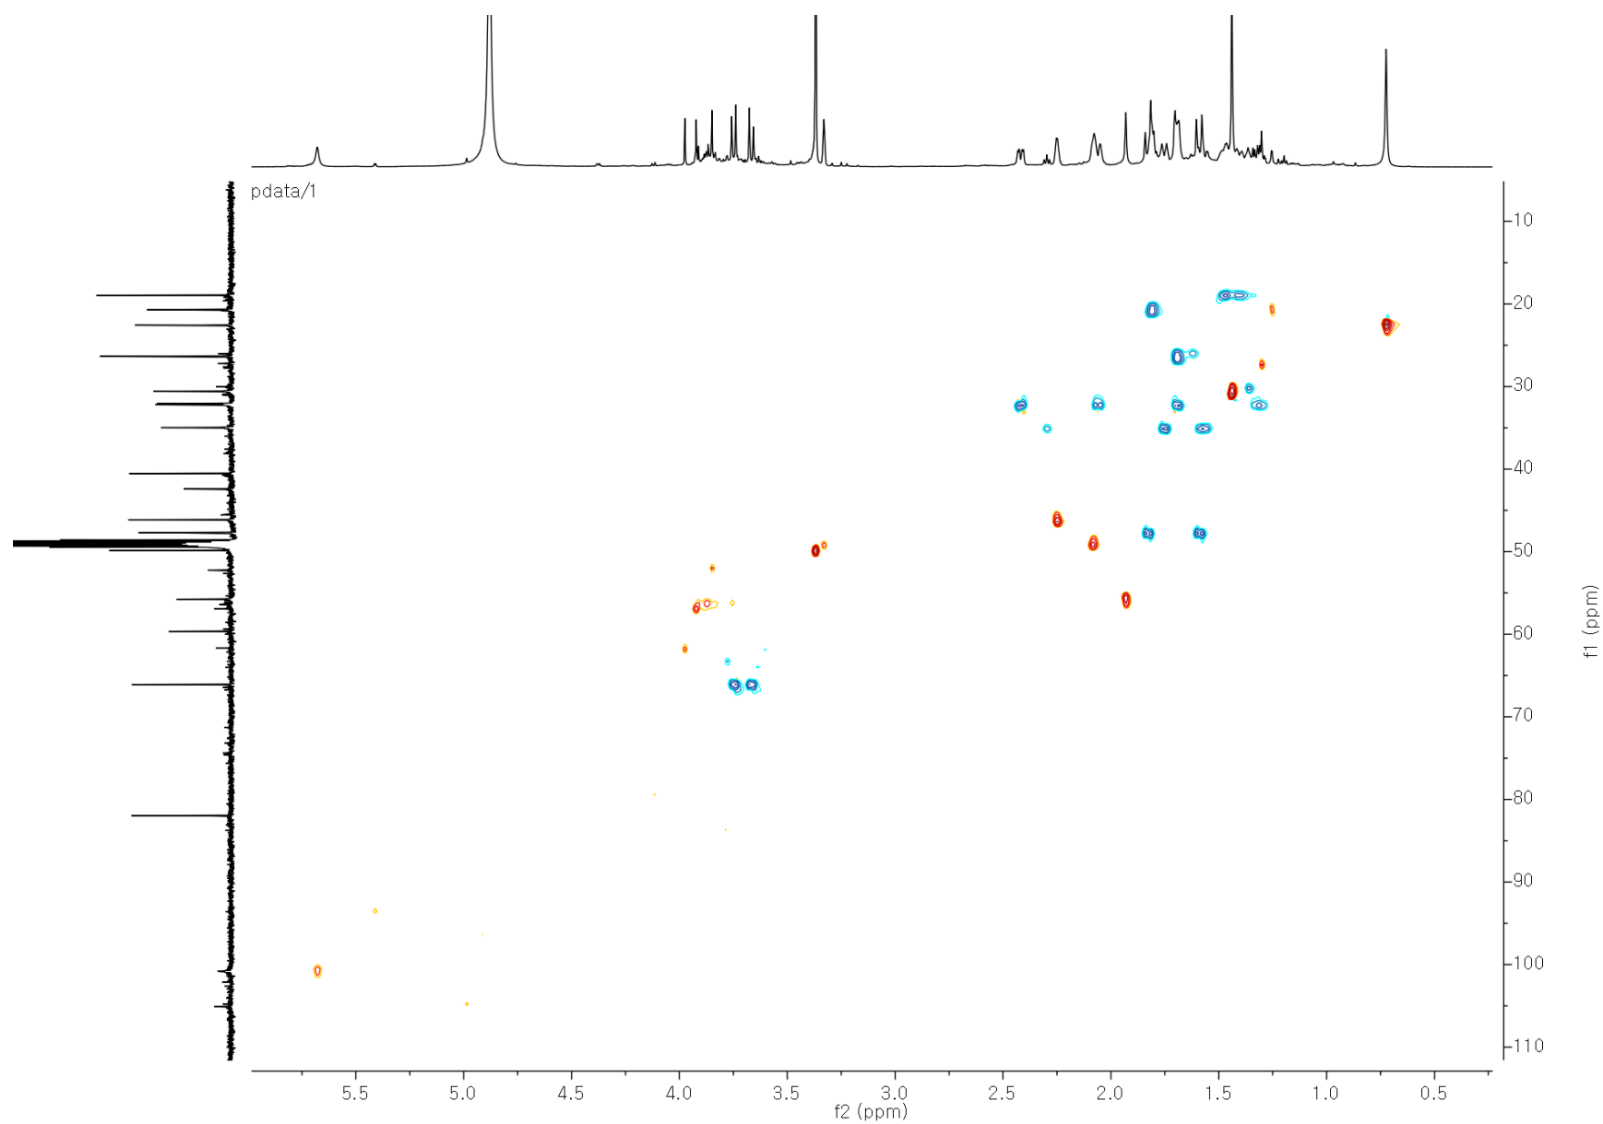

**Figure S4** HSQC spectrum of compound **1** (methanol- $d_4$ )

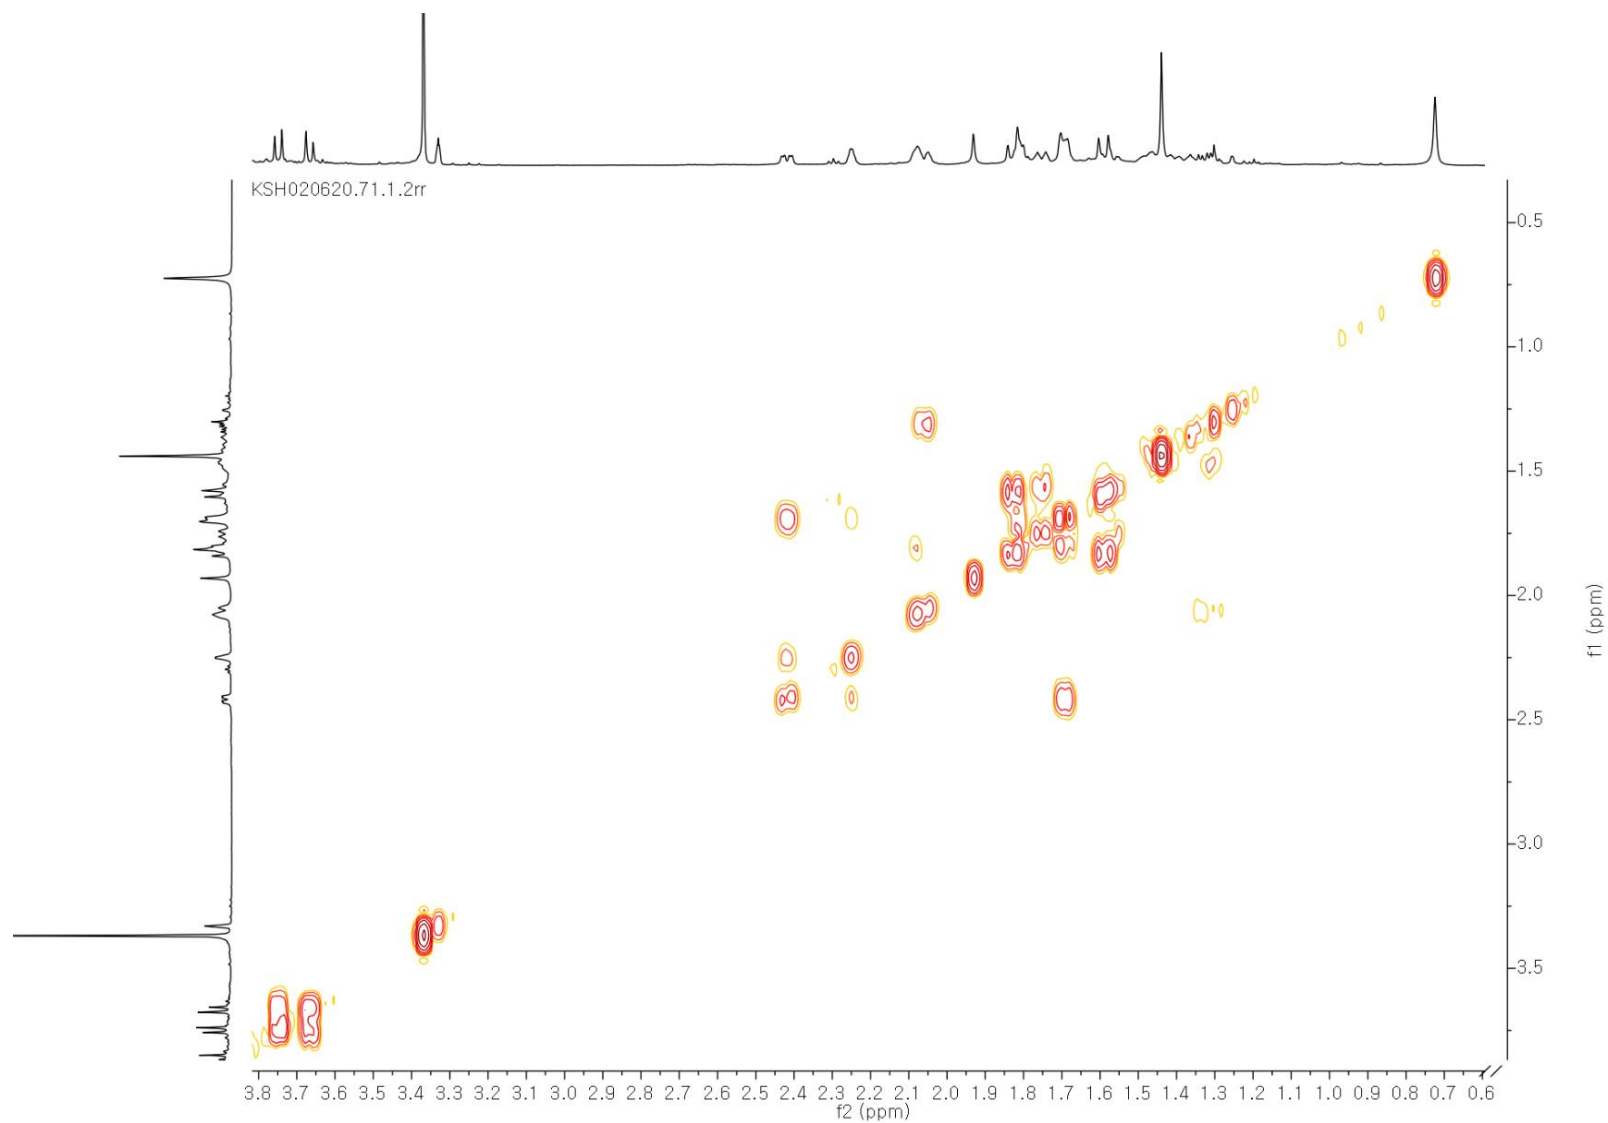

**Figure S5** COSY of compound **1** (methanol- $d_4$ )

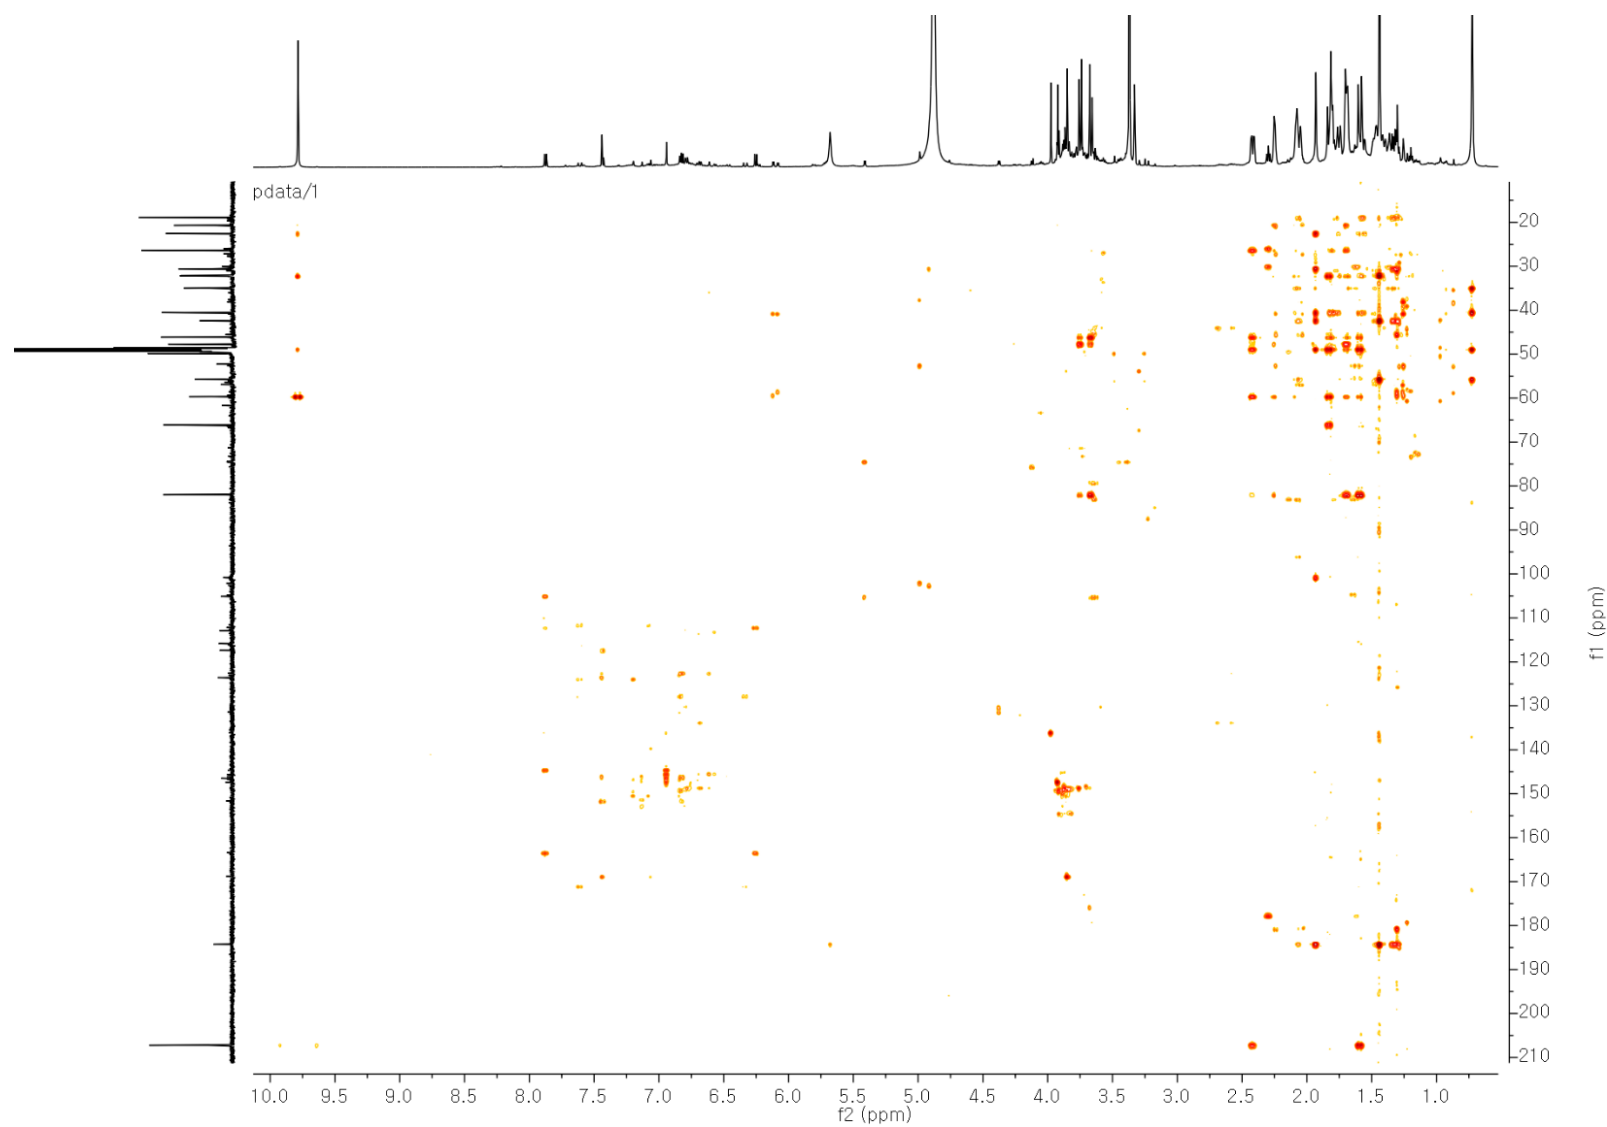

**Figure S6** HMBC spectrum of compound **1** (methanol- $d_4$ )



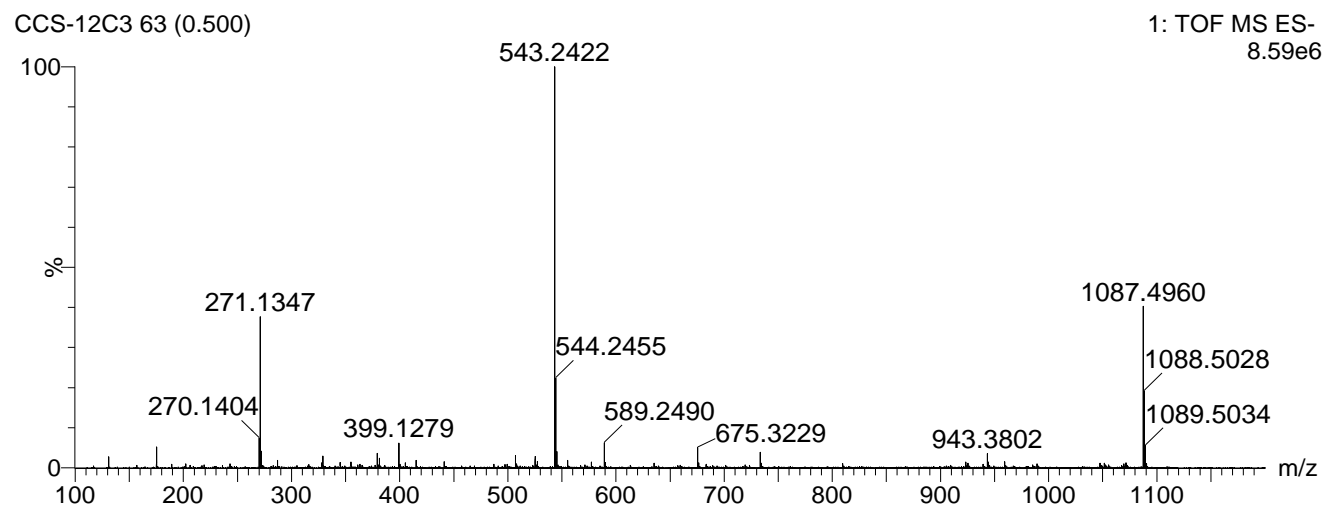

**Figure S7** HR-ESI-MS of compound **2**

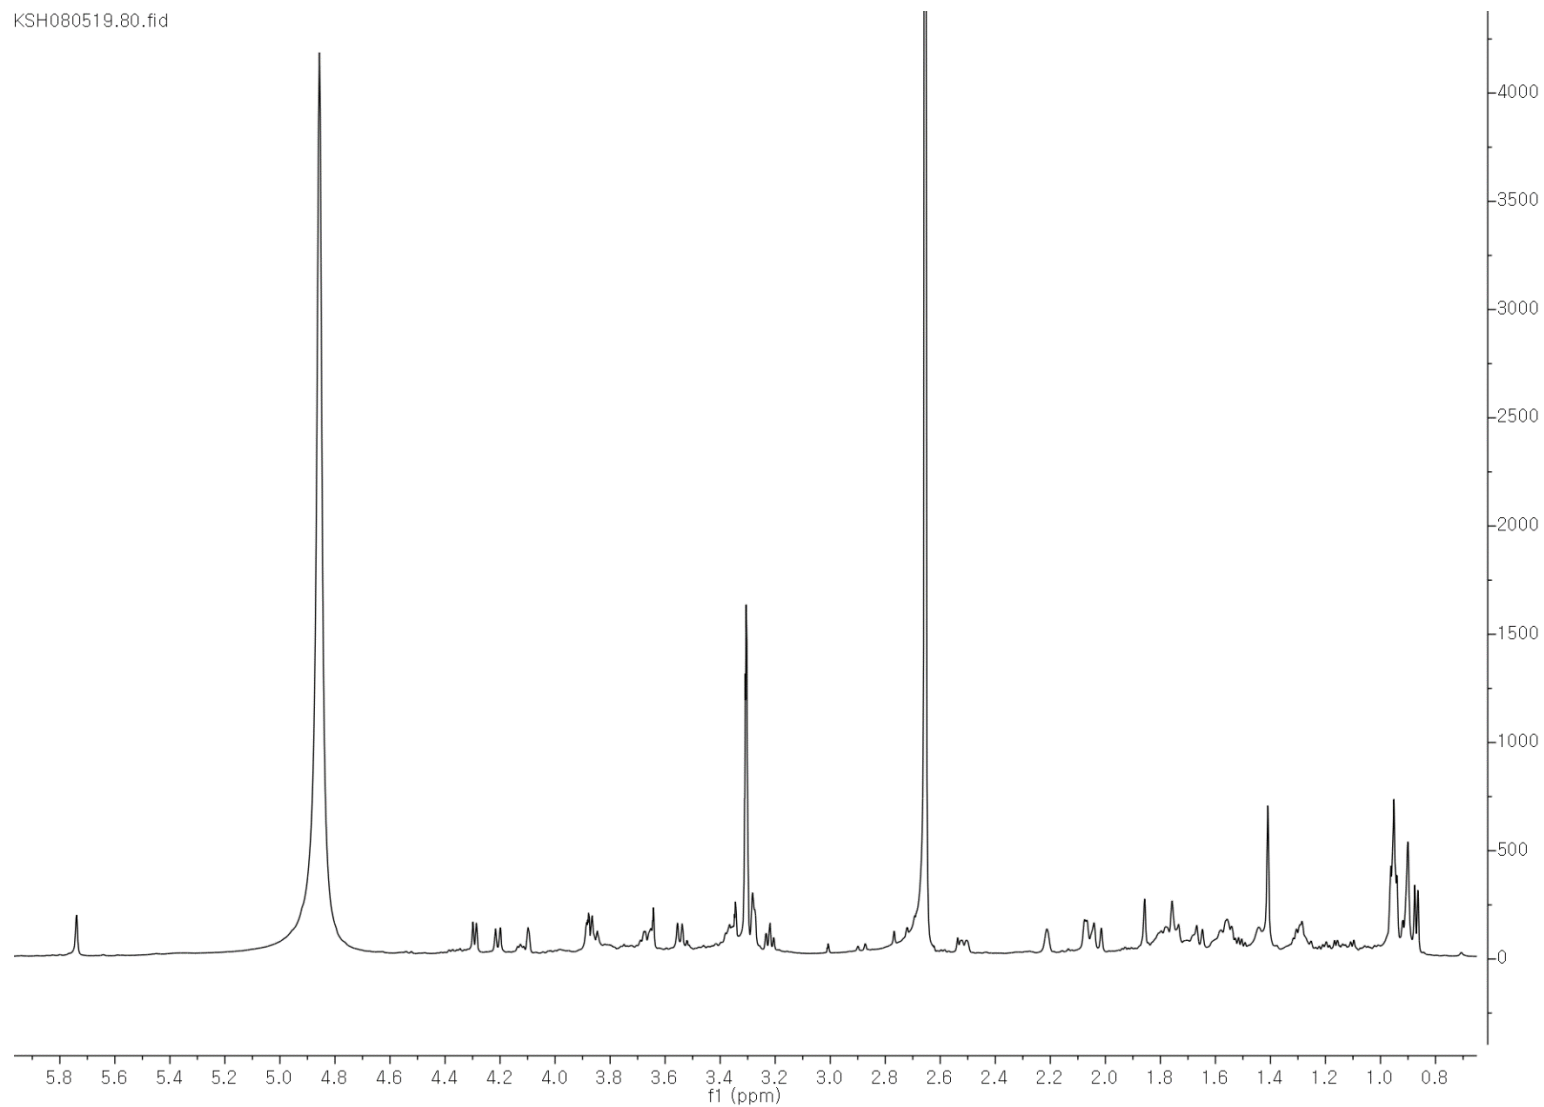

**Figure S8**  $^1\text{H}$ -NMR spectrum of compound **2** (600 MHz, methanol- $d_4$ )

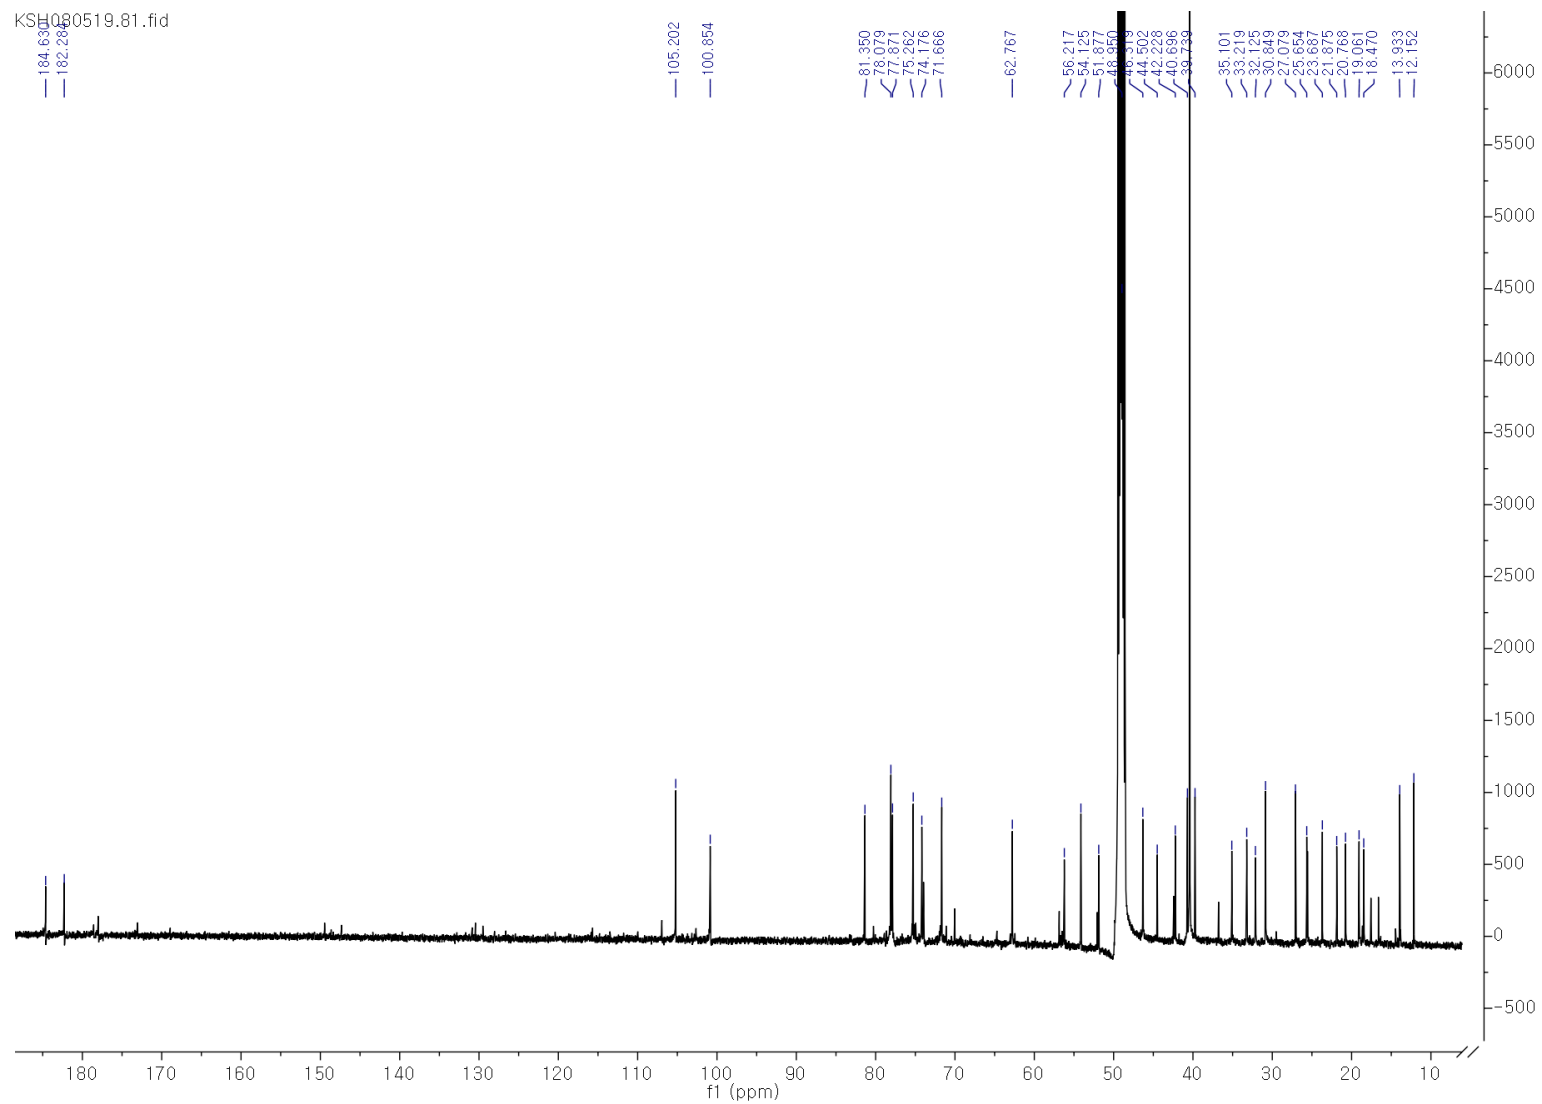

**Figure S9**  $^{13}\text{C}$ -NMR spectrum of compound **2** (150 MHz, methanol- $d_4$ )

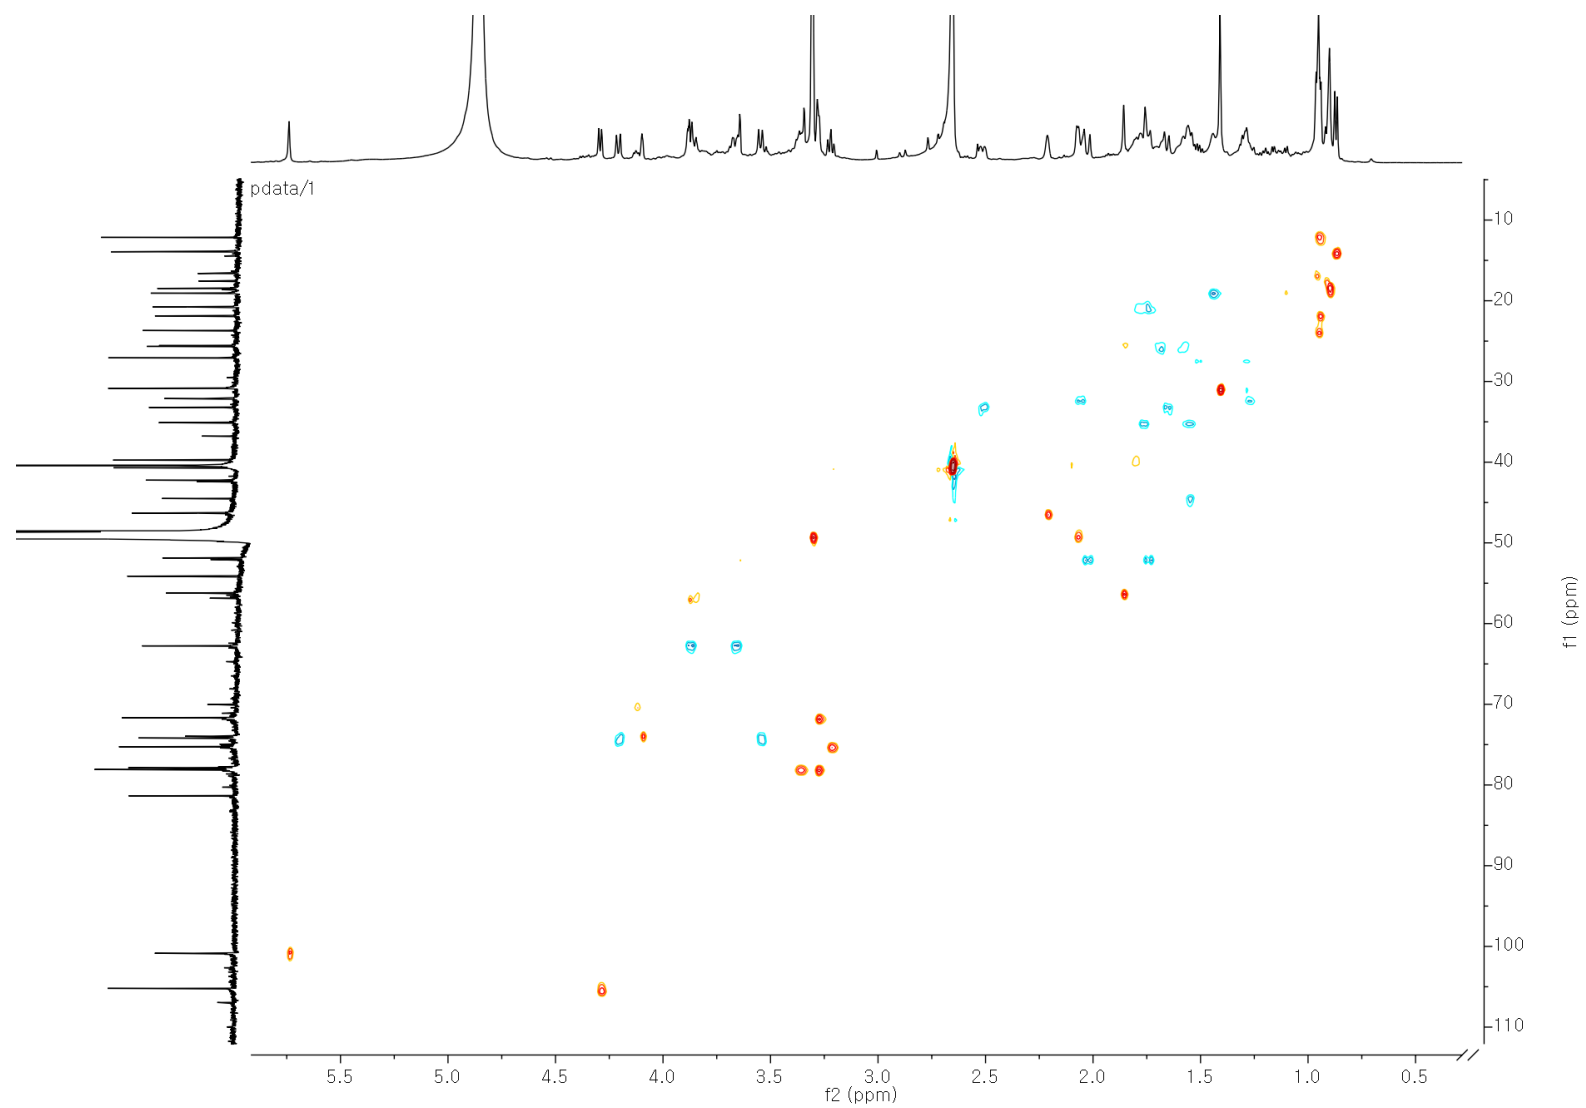

**Figure S10** HSQC spectrum of compound **2** (methanol- $d_4$ )

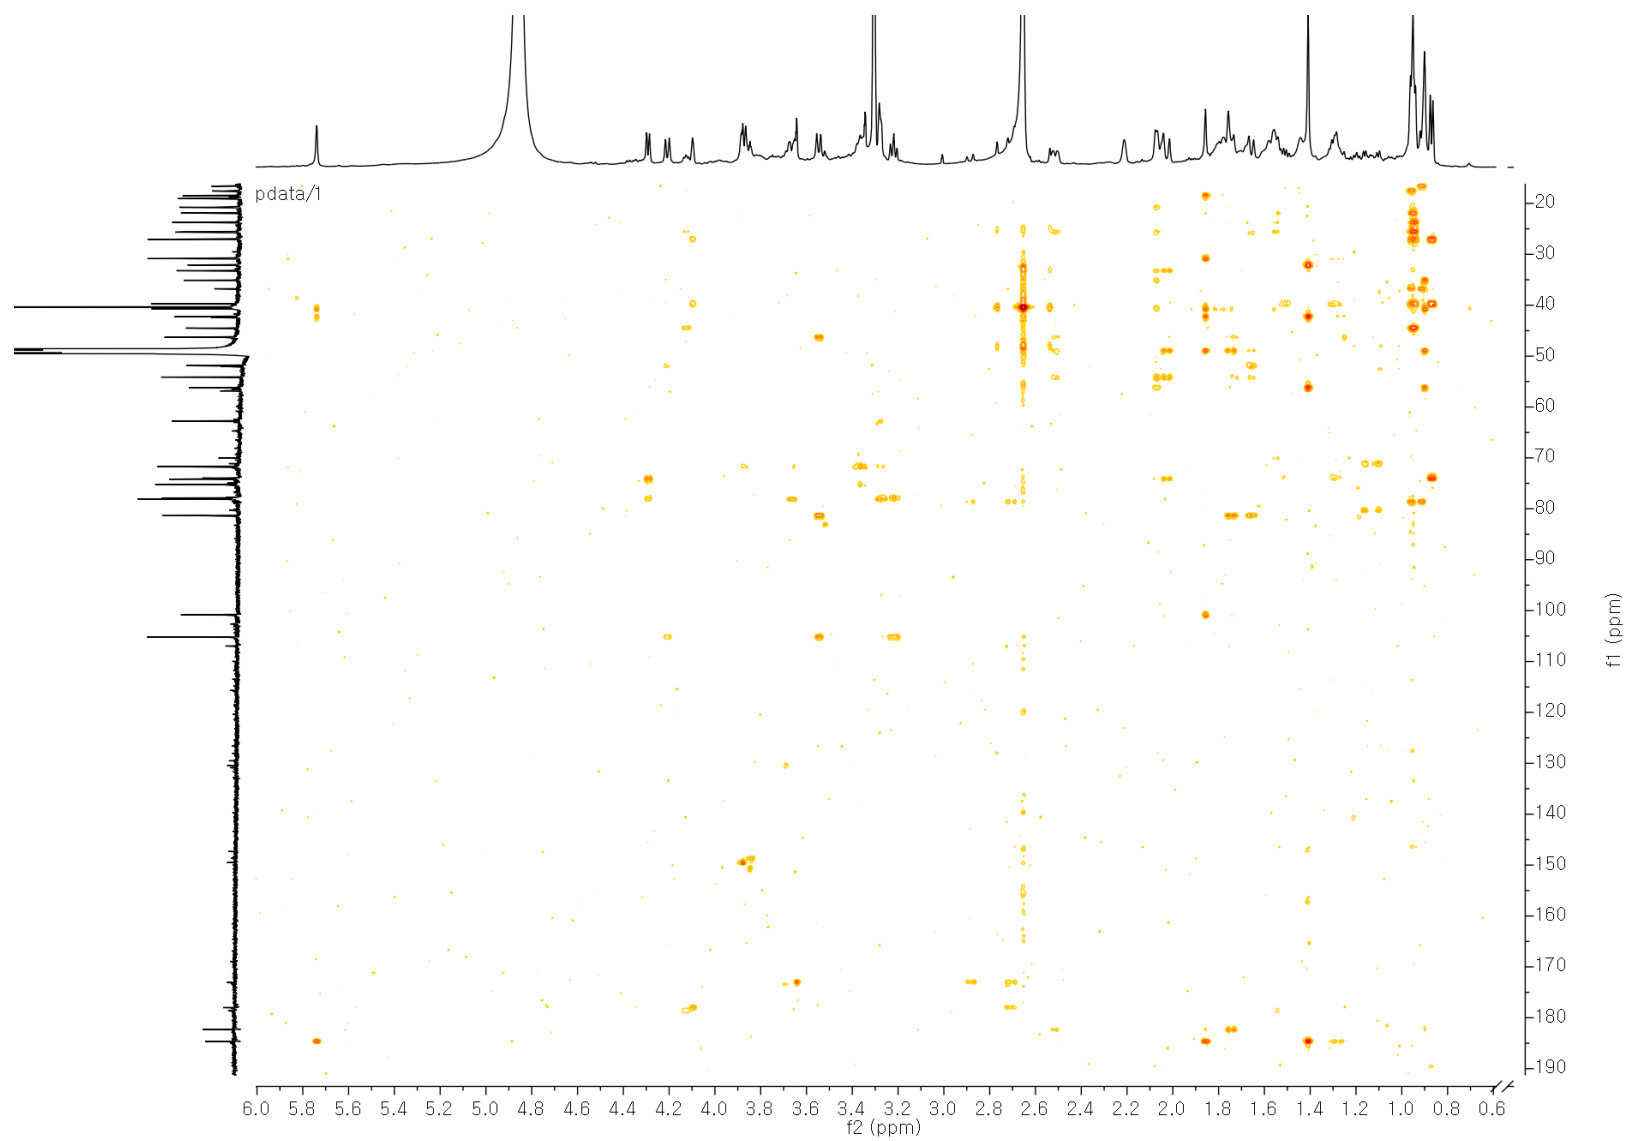

**Figure S11** HMBC spectrum of compound **2** (methanol- $d_4$ )

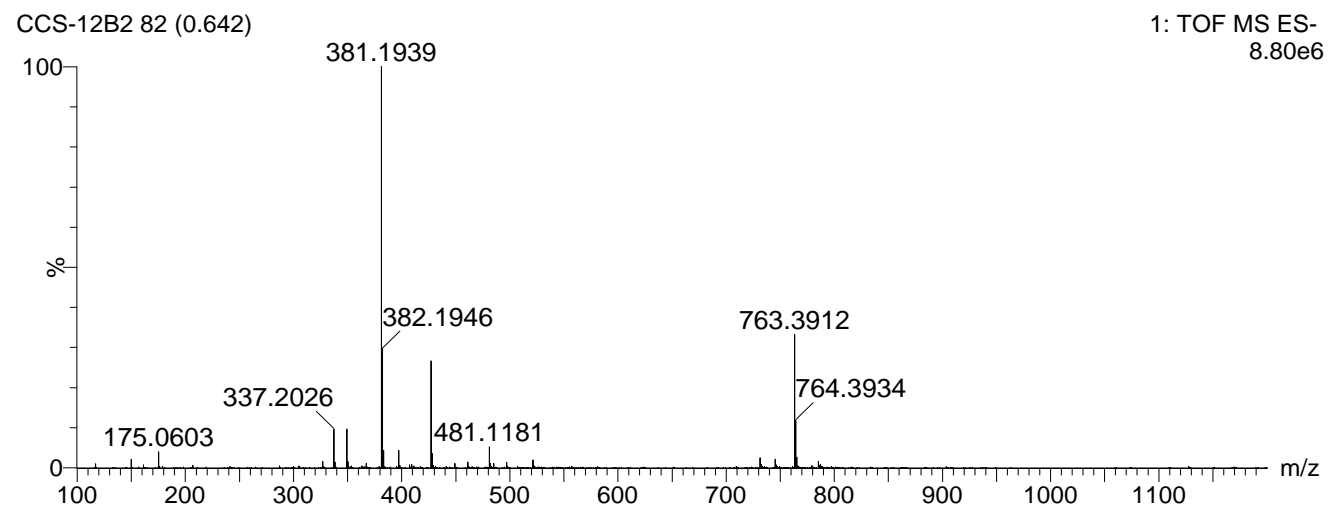

**Figure S12** HR-ESI-MS of compound **6**

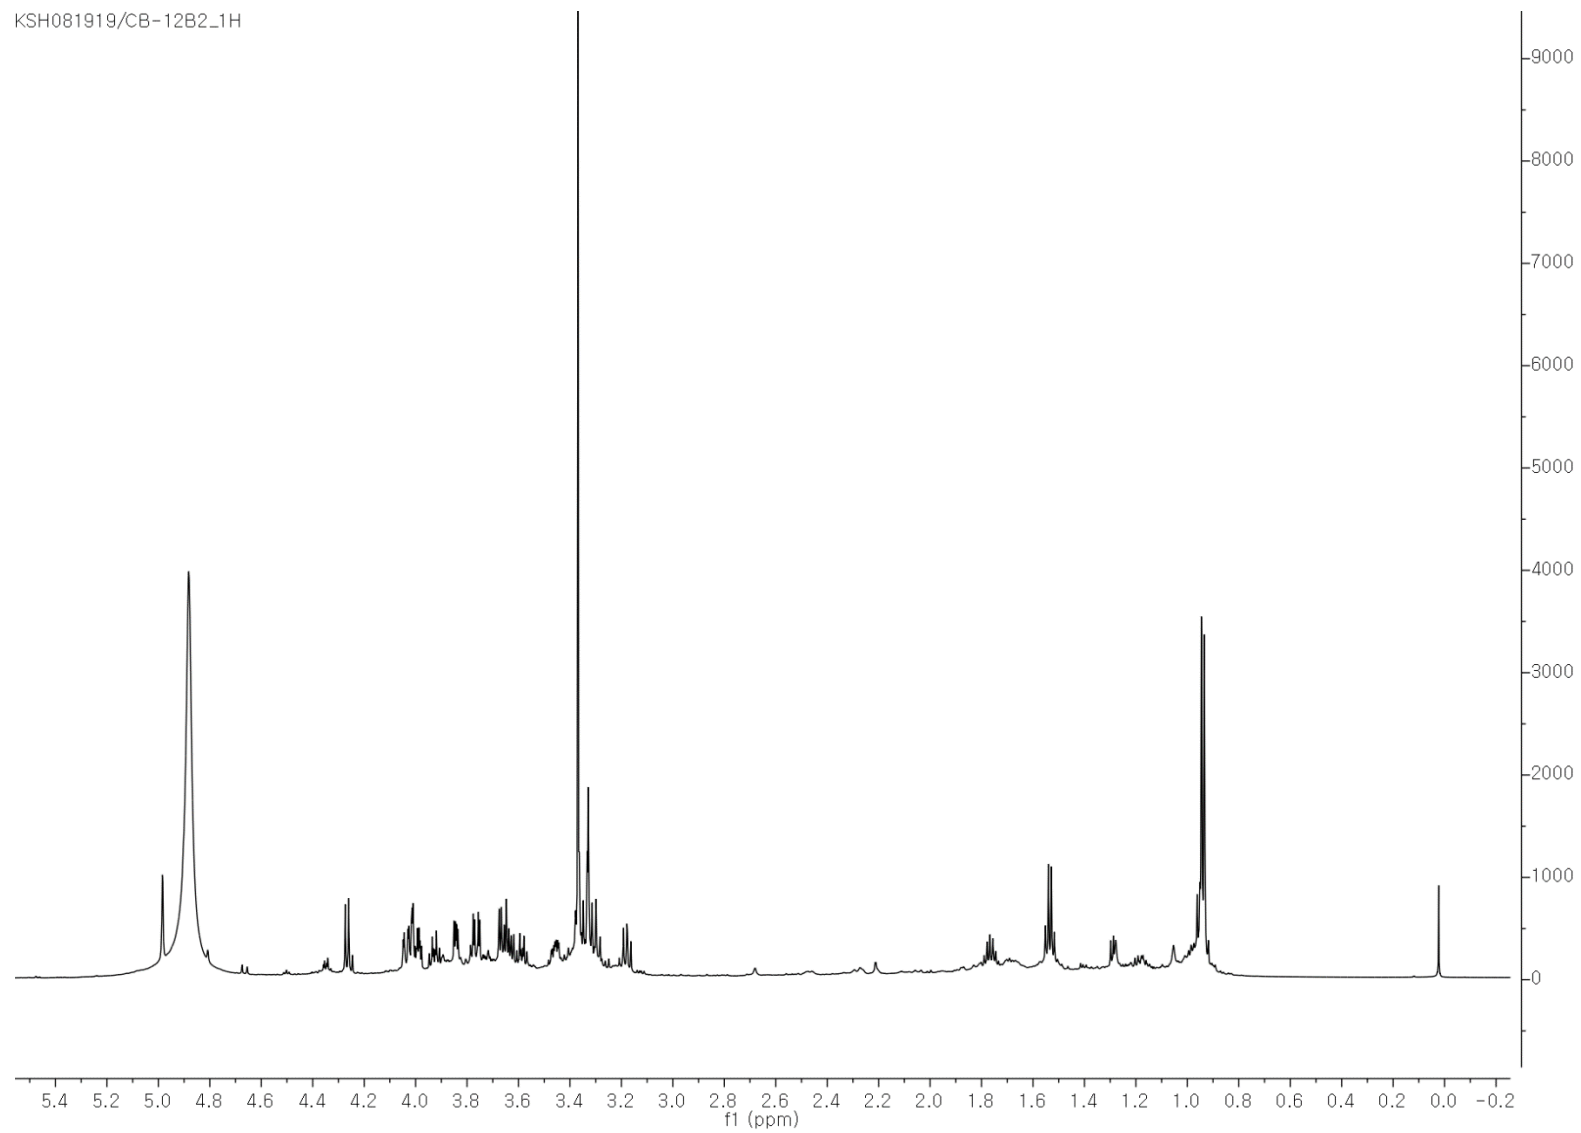

**Figure S13**  $^1\text{H}$ -NMR spectrum of compound **6** (600 MHz,  $\text{methanol-}d_4$ )

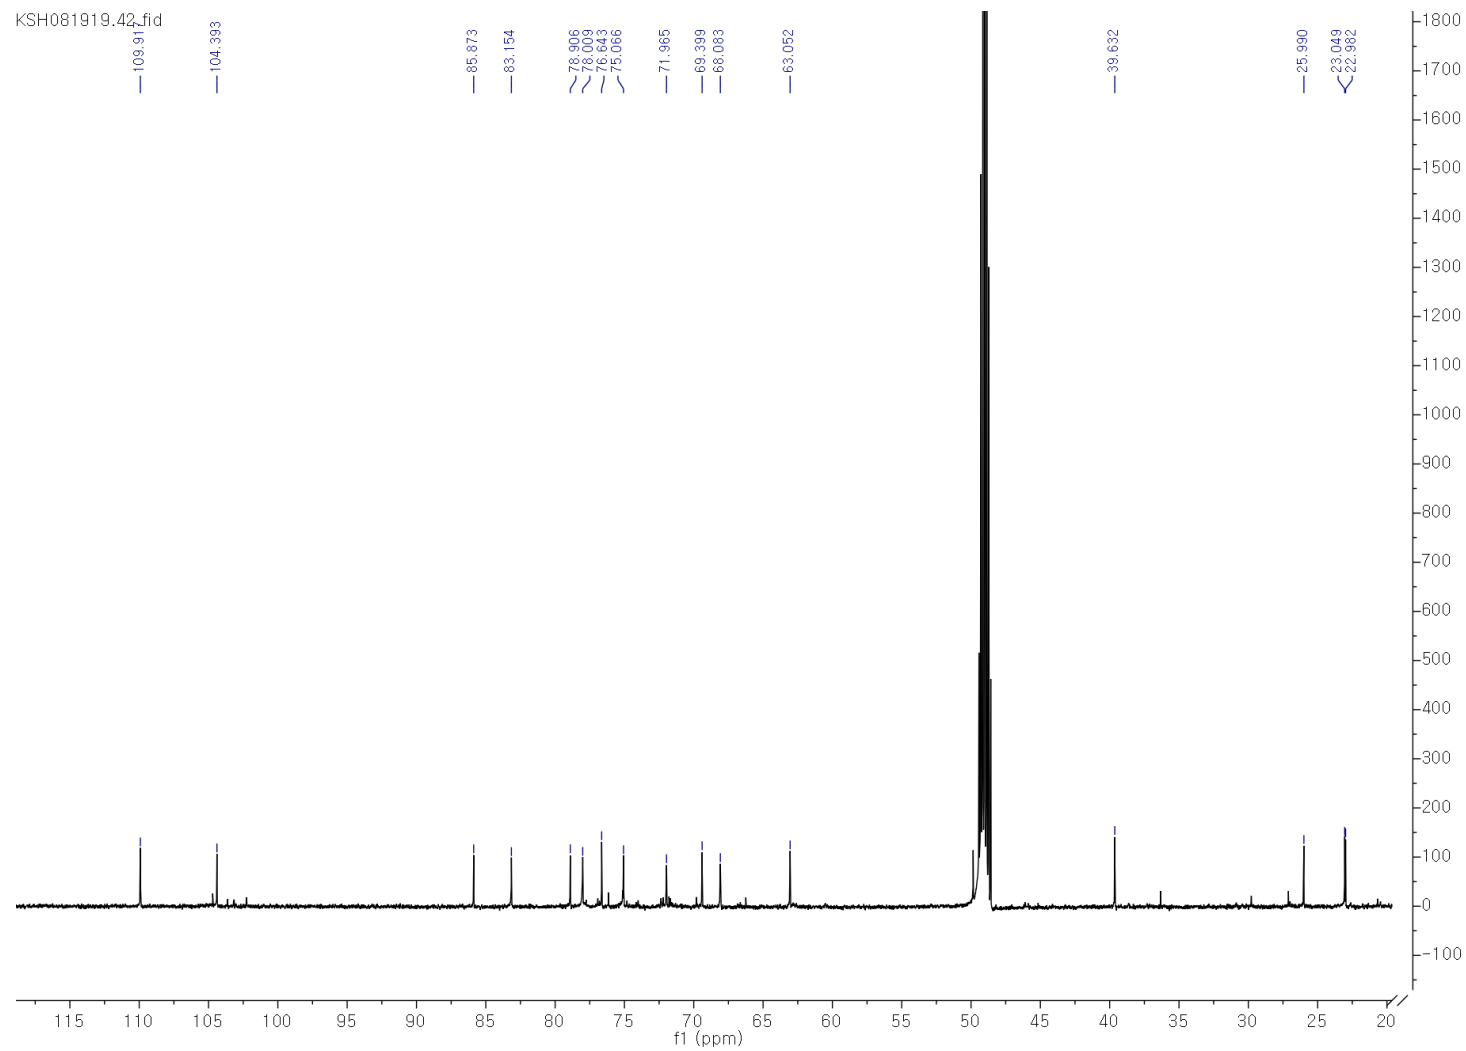

**Figure S14**  $^{13}\text{C}$ -NMR spectrum of compound **6** (150 MHz, methanol- $d_4$ )



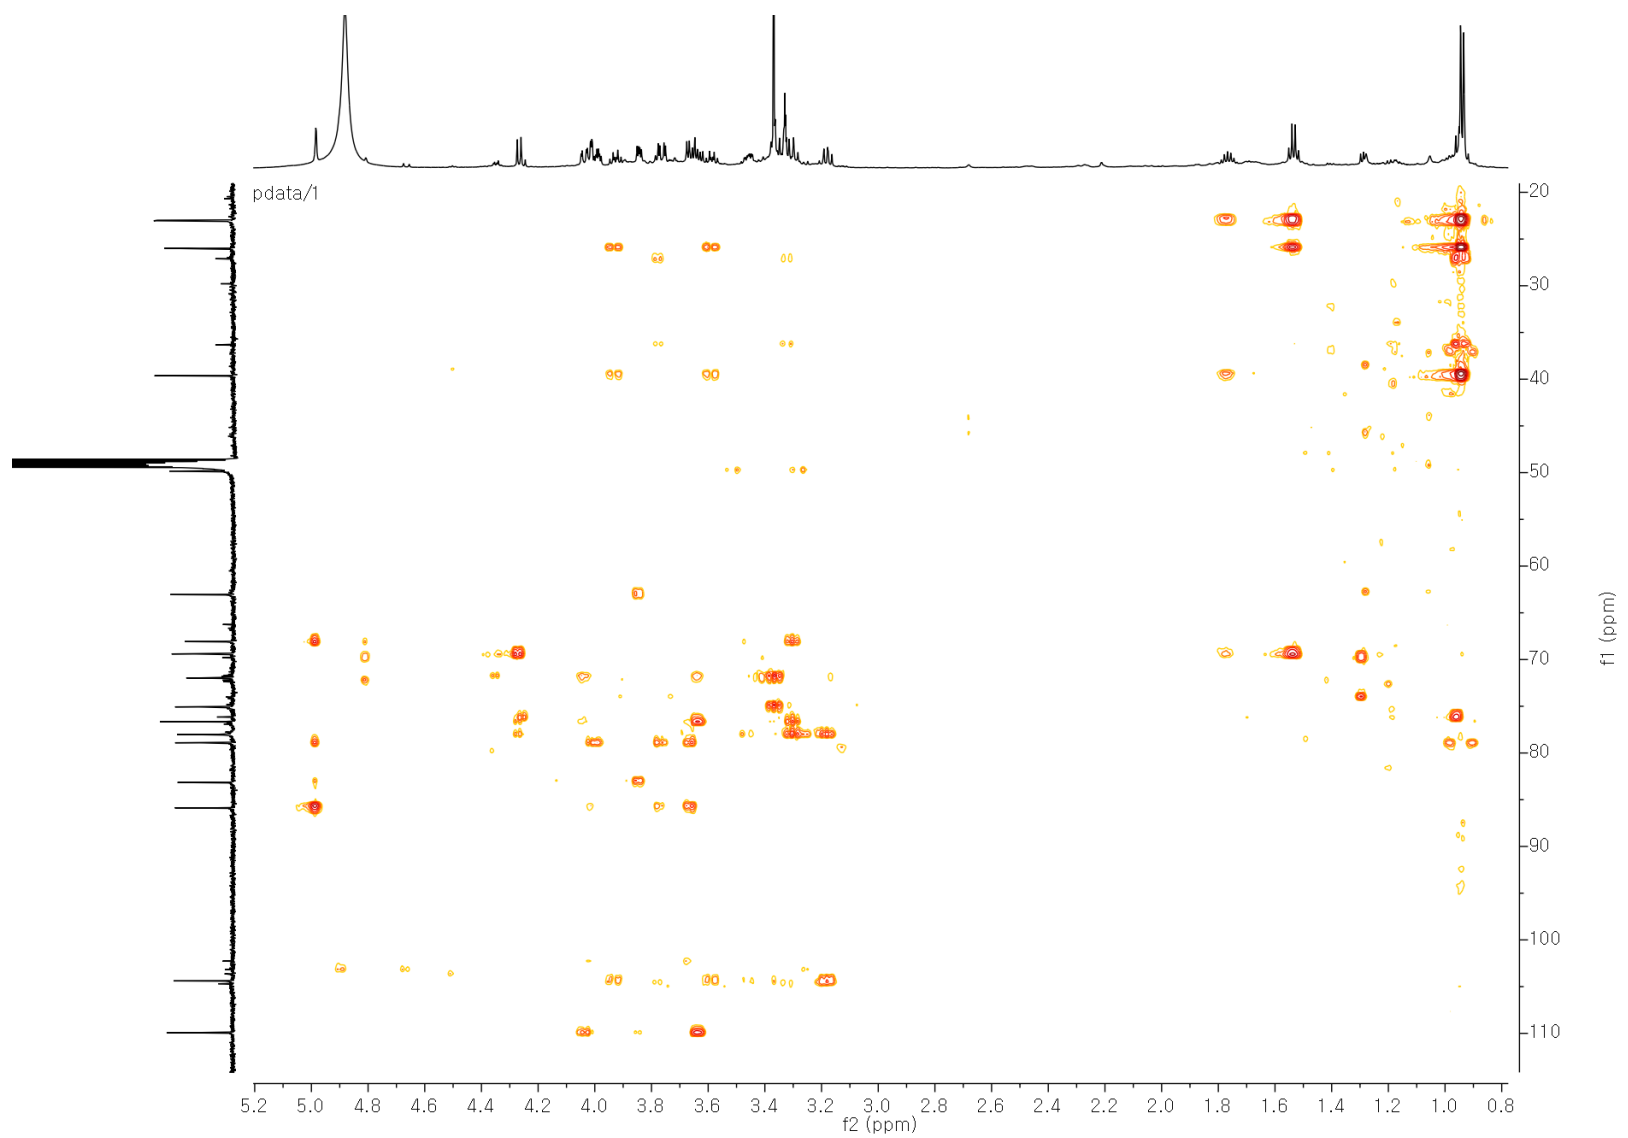

**Figure S15** HMBC spectrum of compound **6** (methanol- $d_4$ )

CCS-12B4 81 (0.631)

1: TOF MS ES-  
5.83e6

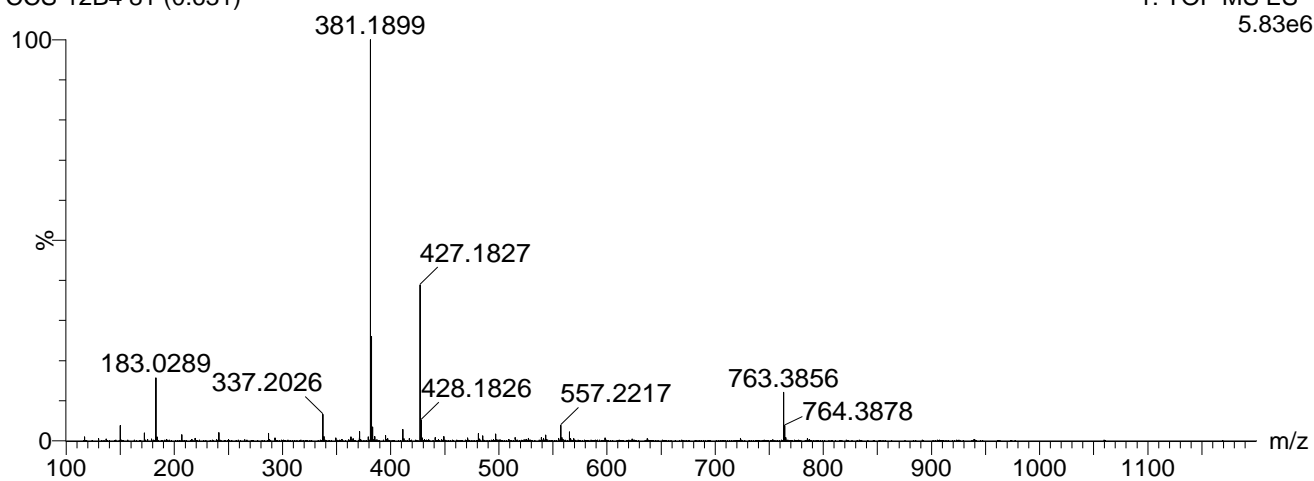

**Figure S16** HR-ESI-MS of compound **7**

KSH080519.20.fid

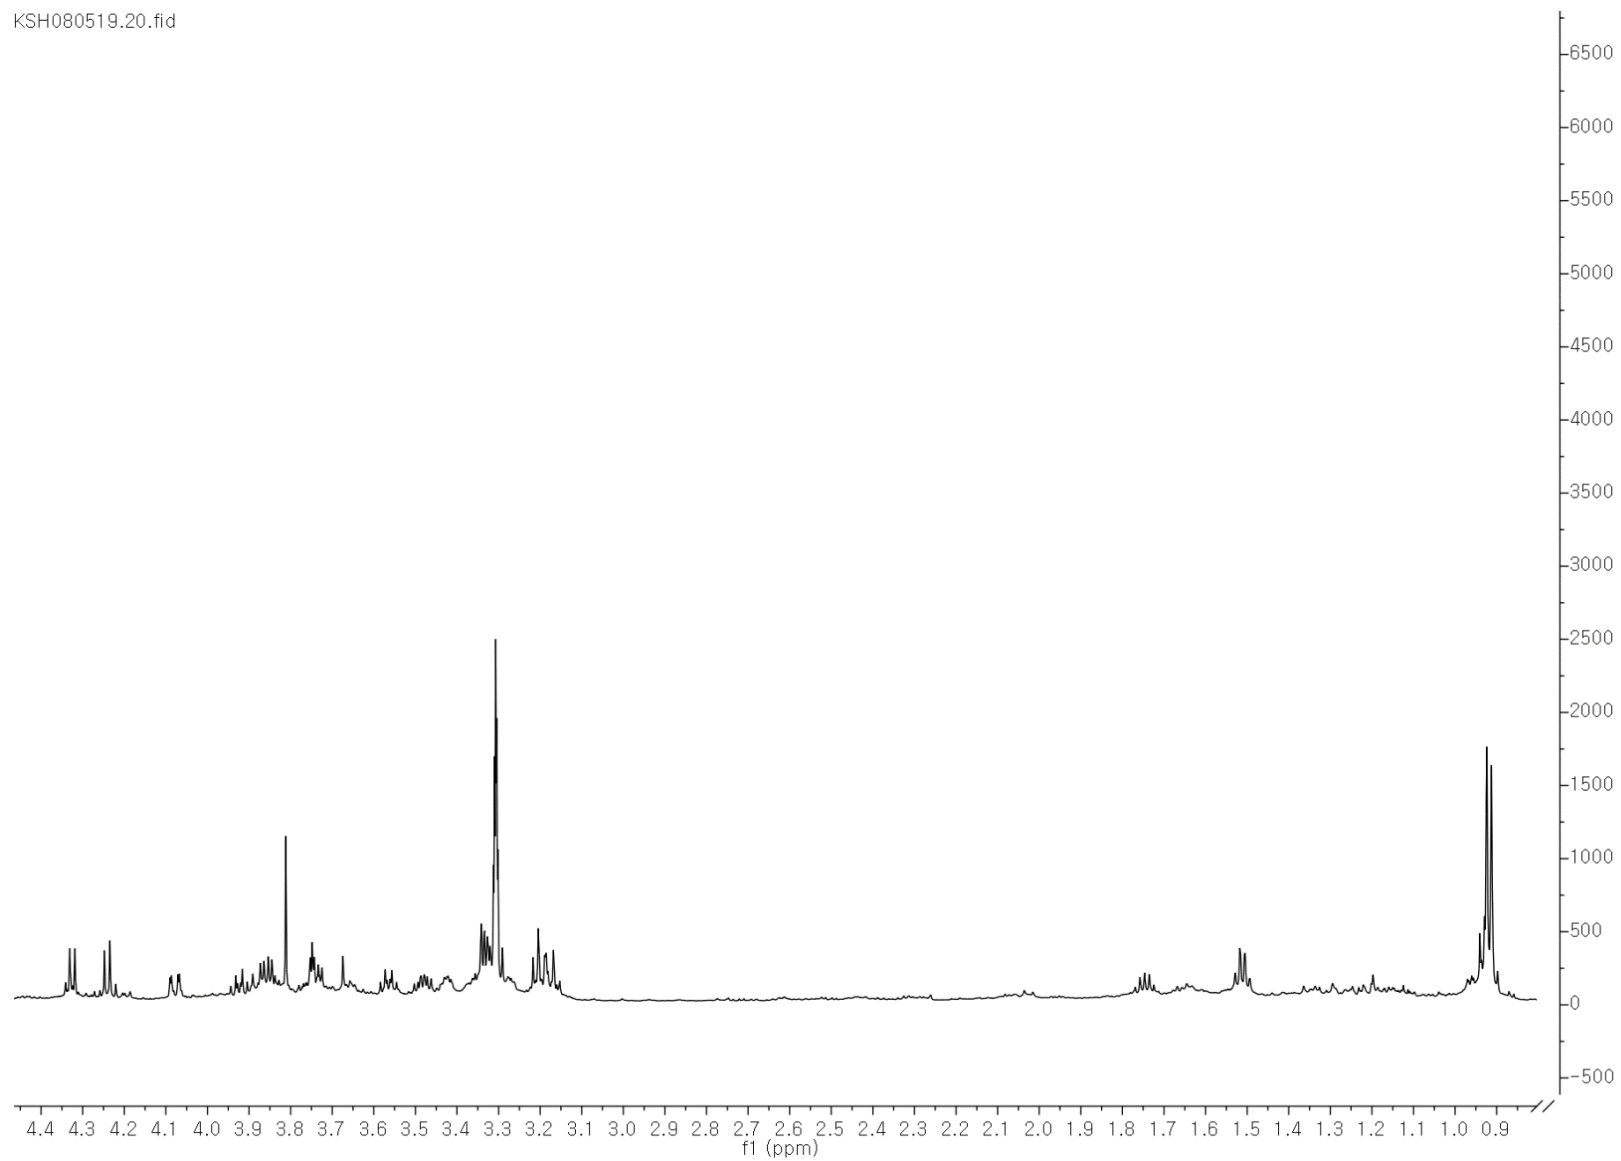

**Figure S17**  $^1\text{H}$ -NMR spectrum of compound **7** (600 MHz,  $\text{methanol-}d_4$ )

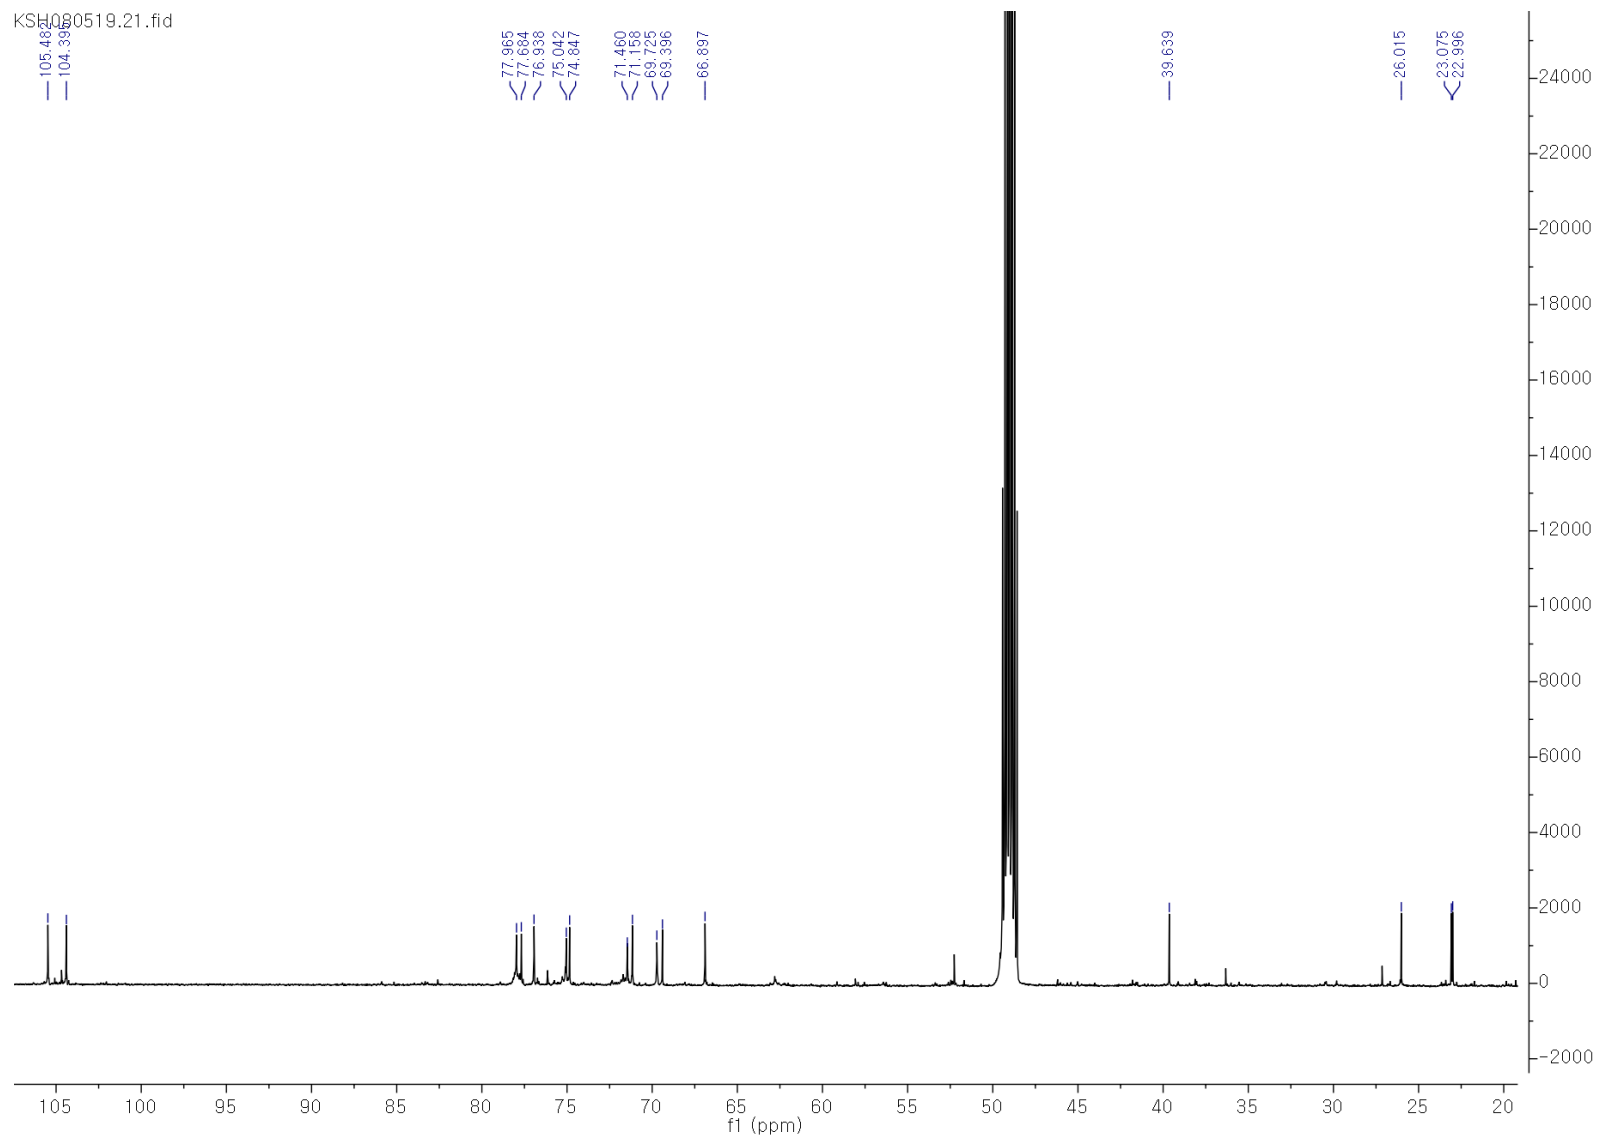

**Figure S18**  $^{13}\text{C}$ -NMR spectrum of compound **7** (150 MHz, methanol- $d_4$ )

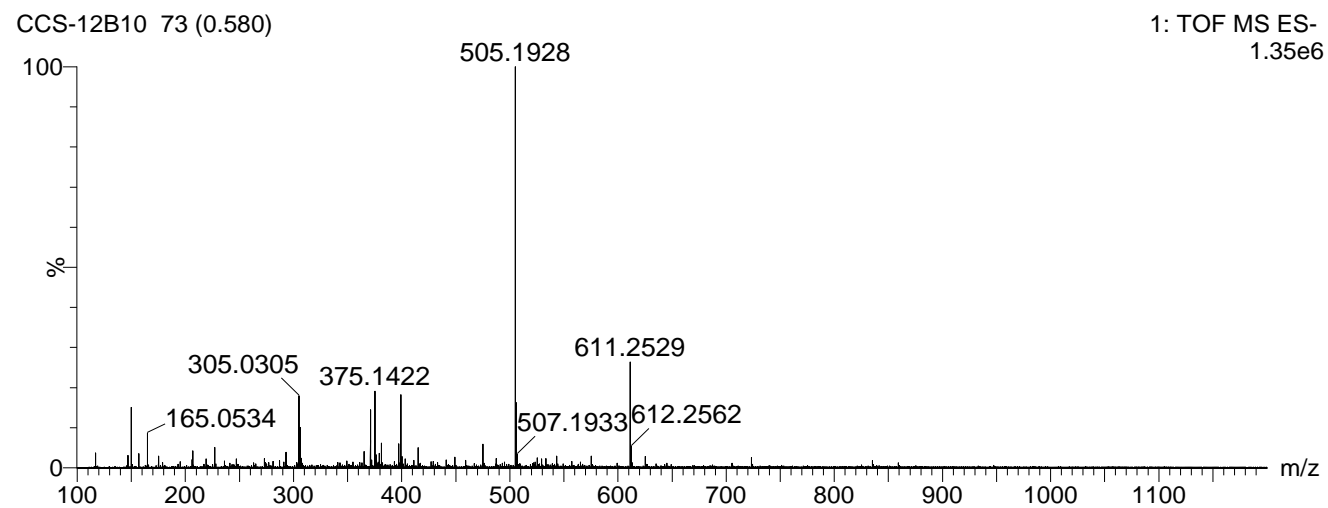

**Figure S19** HR-ESI-MS of compound **8**

KSH080519.40.fid

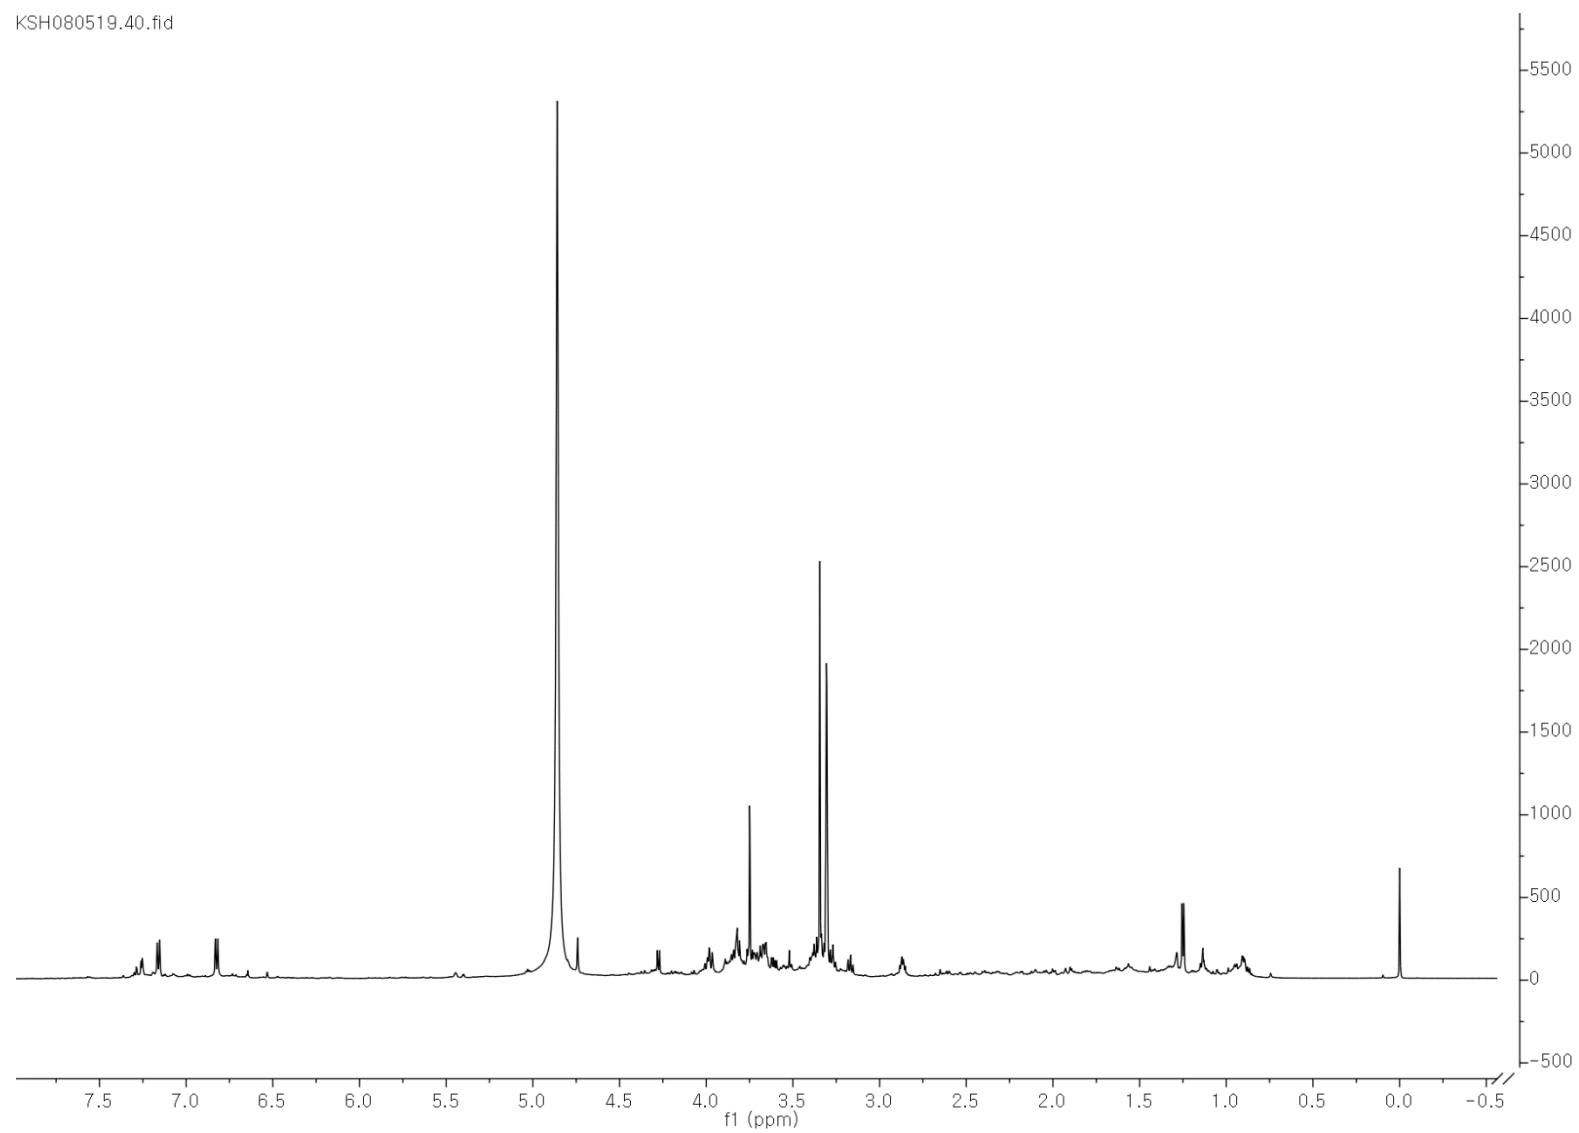

**Figure S20**  $^1\text{H}$ -NMR spectrum of compound **8** (600 MHz,  $\text{methanol-}d_4$ )

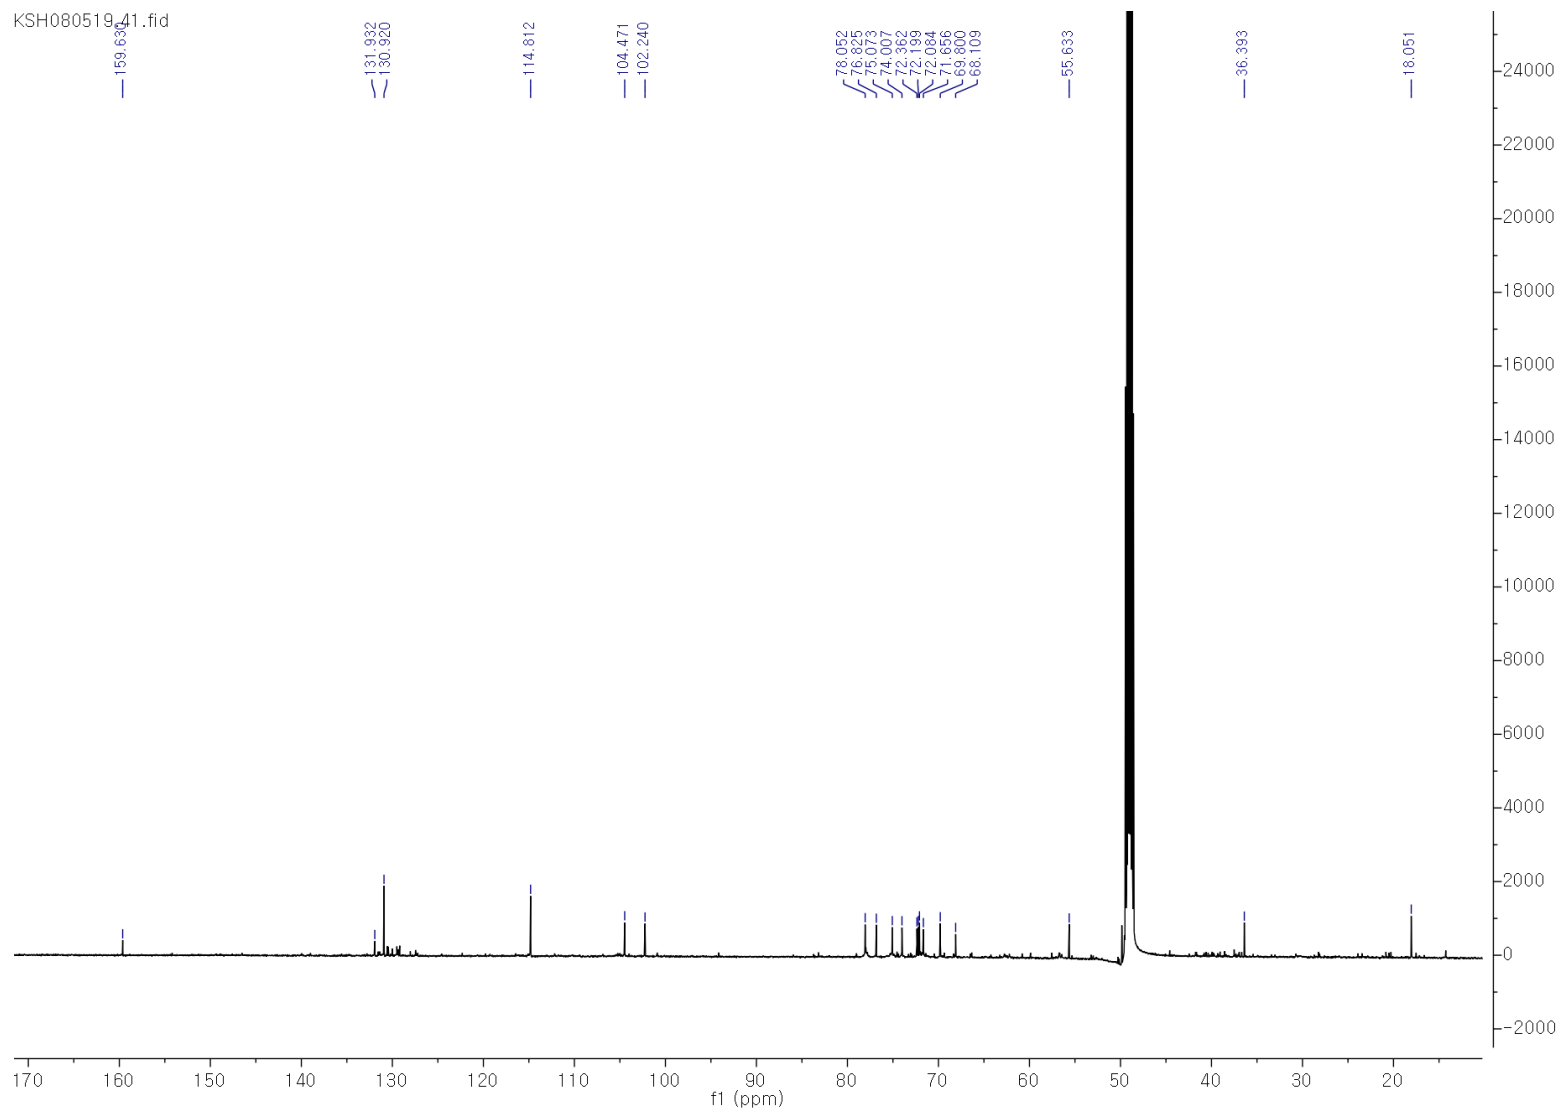

**Figure S21**  $^{13}\text{C}$ -NMR spectrum of compound **8** (150 MHz, methanol- $d_4$ )

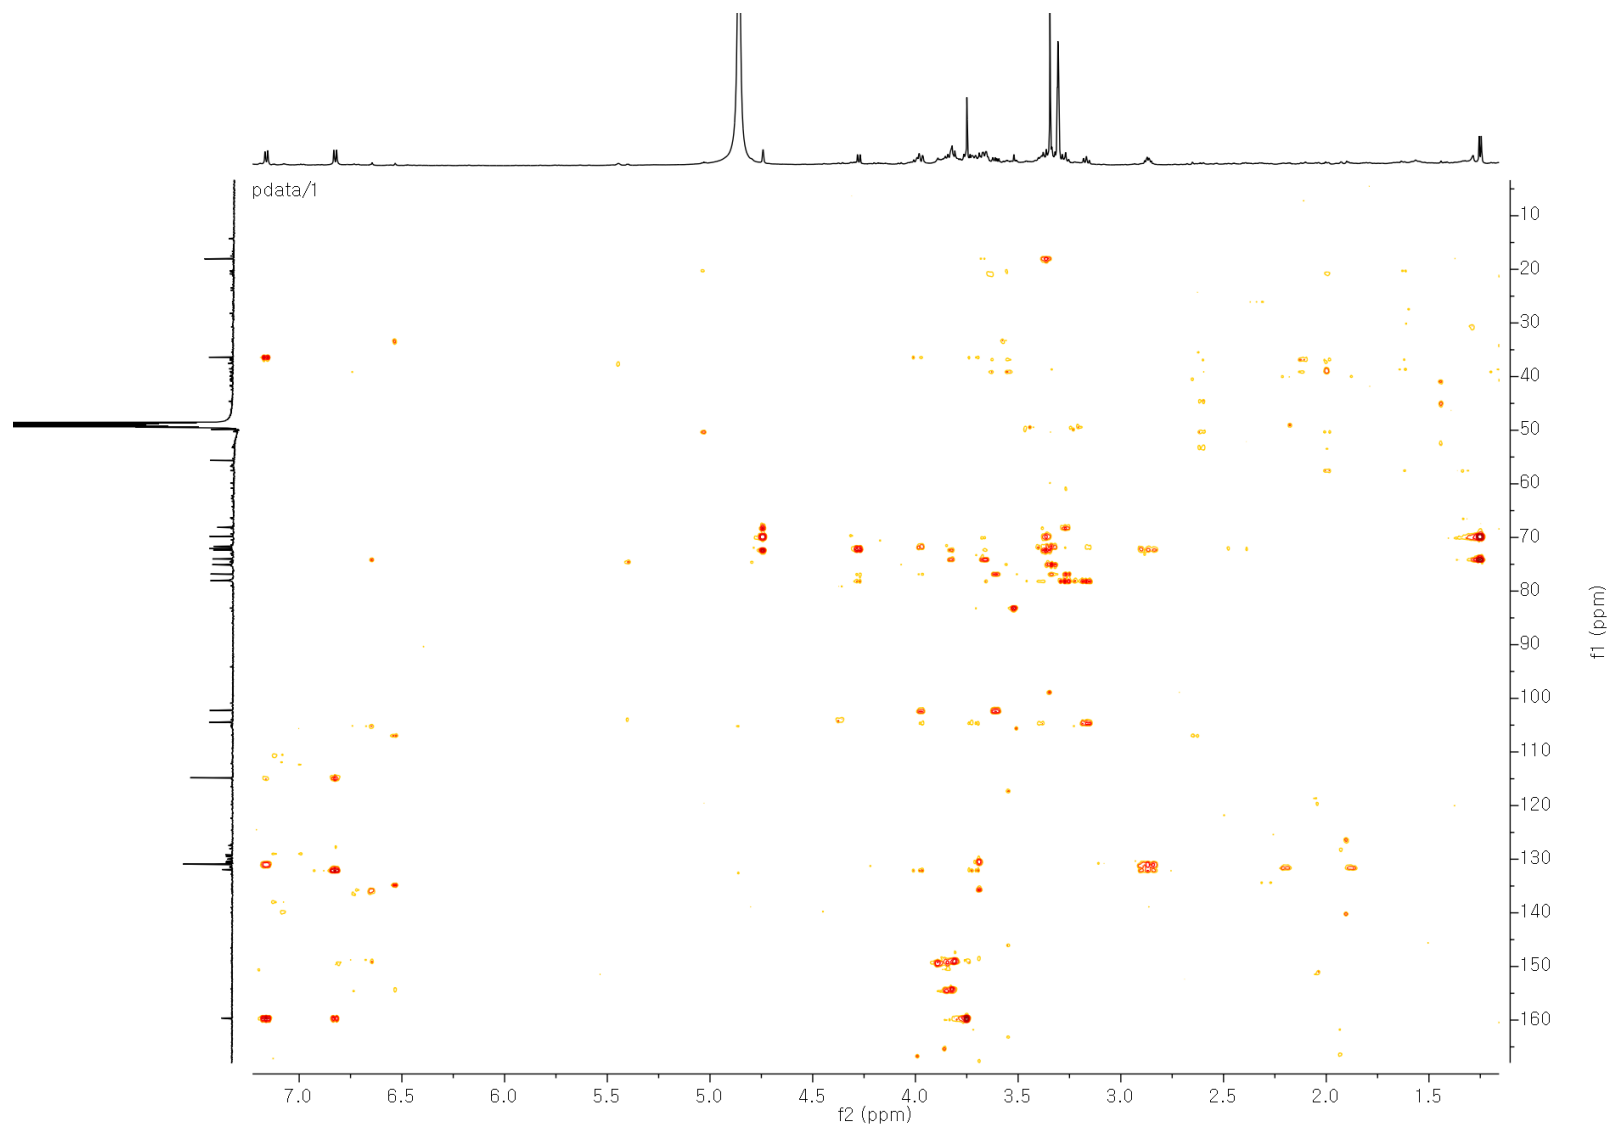

**Figure S22** HMBC spectrum of compound **8** (methanol- $d_4$ )
